# Supplementary material
Source: publisher figshare collection journal article supplement (https://acs.figshare.com/ndownloader/files/3765832)
Supplement: Supplementary file 1 [file 3765832]

## Supplementary Information

# **Fine-Tuned Intrinsically Ultramicroporous Polymers Redefine the Permeability/Selectivity Upper Bounds of Membrane-Based Air and Hydrogen Separations**

Raja Swaidan, Bader Ghanem, Ingo Pinnau\*

Advanced Membranes and Porous Materials Center (AMPMC), Physical Sciences and Engineering Division, King Abdullah University of Science and Technology (KAUST), Thuwal, 23955-6900, KSA

\*Corresponding author: Al-Jazri Bldg. 4, Tel: +966-12-808-2406

*E-mail address:* ingo.pinnau@kaust.edu.sa (I. Pinnau)

## Experimental

### *Polymer Film Preparation and Storage*

Solutions containing 3-5 wt% polymer in chloroform were syringe-filtered with 0.45  $\mu\text{m}$  PTFE filters and cast onto clean, flat-bottomed glass dishes. Clear, isotropic polymer films were obtained by covering the dishes to induce slow evaporation of the casting solvent. All films were dried at 120  $^{\circ}\text{C}$  under vacuum for 12 h, soaked in methanol for 24 h to “reset” their thermal histories and exchange any residual casting solvent, and finally dried at 120  $^{\circ}\text{C}$  under vacuum for 24 h – except those of PIM-EA-TB, PIM-Trip-TB and SBFDA-DMN, which were air-dried after the methanol soak. Removal of the casting solvent was confirmed with thermal gravimetric analysis (TGA, TA Q-5000). Effective areas and thicknesses of the films were determined by calibrated scanning software and a digital micrometer, respectively. During the first 15 days, all films (except those of PIM-EA-TB, PIM-Trip-TB and SBFDA-DMN) were aged *in-vacuo* at 35  $^{\circ}\text{C}$  and then kept in plastic bags under ambient conditions thereafter during physical aging. PIM-EA-TB, PIM-Trip-TB and SBFDA-DMN were stored under ambient conditions during the physical aging.

### *Pure-gas Permeation Measurements*

The pure-gas permeabilities of the films were determined using the constant-volume/variable-pressure method. Films dried after the methanol soak were immediately masked between two aluminum-tape donuts. On one side, the interface between the film and tape was lightly epoxied using a two-part potting epoxy (GC Electronics) which showed excellent durability over long times. The masked film was degassed in the permeation test apparatus on both sides under high vacuum at 35  $^{\circ}\text{C}$ . Pure gases (grade 5 and above) were fed to the epoxied side at 35  $^{\circ}\text{C}$  and 2 bar.

Data for PIM-EA-TB, PIM-Trip-TB and PIM-PI-EA were previously reported and collected at 25 °C after *ambient* drying of the methanol-soaked films. The increase in permeate pressure with time was measured by an MKS Baratron transducer. The pure-gas permeabilities were calculated by

$$P = DS = 10^{10} \frac{V_d l}{p_{up} A R T} \frac{dp}{dt}$$

where  $P$  is the gas permeability (Barrer) ( $1 \text{ Barrer} = 10^{-10} \text{ cm}^3 \text{ (STP) cm cm}^{-2} \text{ s}^{-1} \text{ cmHg}^{-1}$ ),  $p_{up}$  is the upstream pressure (cmHg),  $dp/dt$  is the steady-state permeate-side pressure increase (cmHg s<sup>-1</sup>),  $V_d$  is the calibrated permeate volume (cm<sup>3</sup>),  $l$  is the membrane thickness (cm),  $A$  is the effective membrane area (cm<sup>2</sup>),  $T$  is the operating temperature (K), and  $R$  is the gas constant ( $0.278 \text{ cm}^3 \text{ cmHg cm}^{-3} \text{ (STP) K}^{-1}$ ). The ideal permselectivity ( $\alpha_{A/B}$ ) for separation of A/B was calculated by:

$$\alpha_B^A = \frac{P_A}{P_B}$$

### ***Low-Pressure Physisorption Measurements***

Powder polymer samples were degassed under high vacuum at 120 °C for 15 hours in the degas port of a Micromeritics ASAP-2020 equipped with the “micropore option.” The nitrogen sorption isotherms were measured using low-pressure dosing at 77 K. Analysis of the pore-size distributions was performed using the NLDFT (Non-Local Density Functional Theory) model, assuming carbon slit-pore geometry in the version 4.02 software provided by Micromeritics.

## PIM gas transport properties post methanol treatment

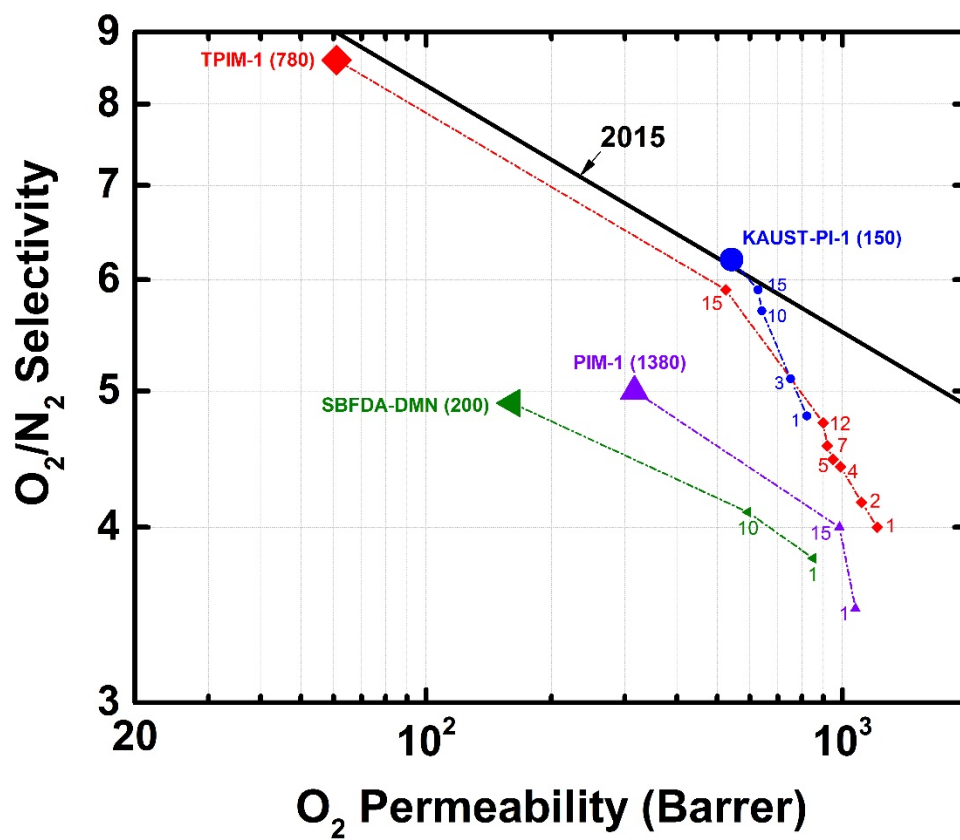

**Figure S1.** Evolution of the  $O_2/N_2$  gas transport properties of several PIMs over time after methanol treatment. The numeric labels indicate days elapsed.

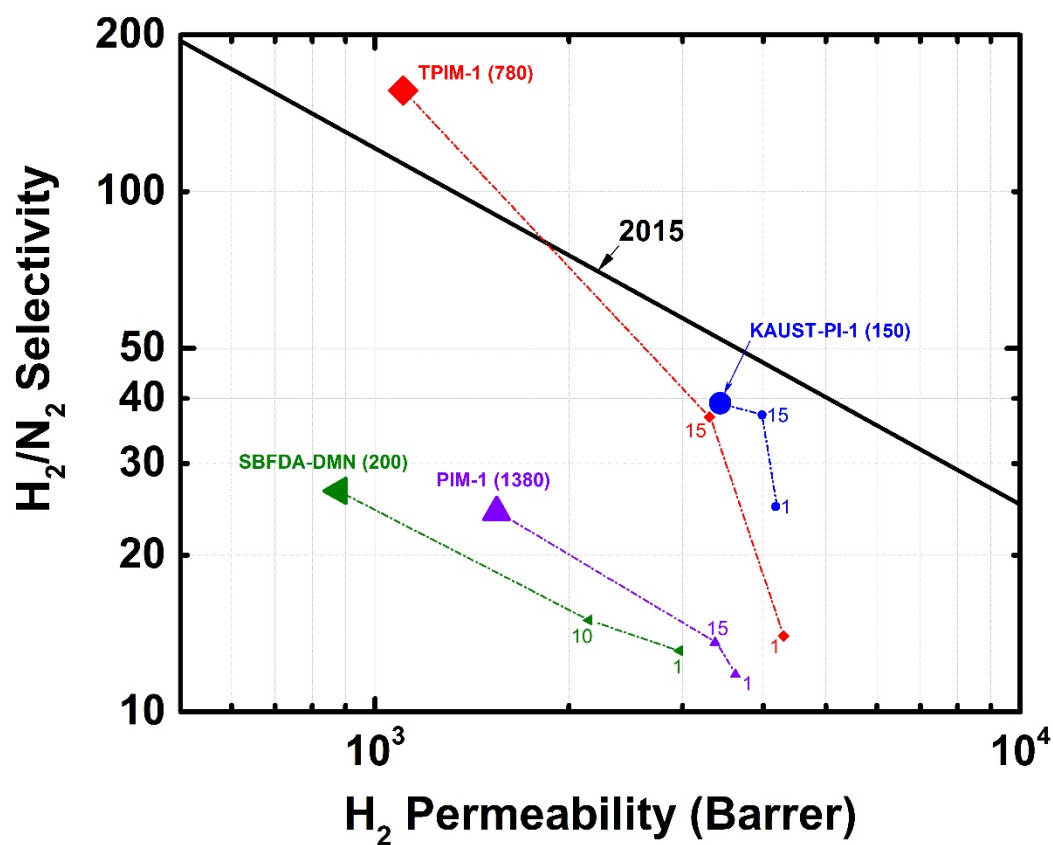

**Figure S2.** Evolution of the  $H_2/N_2$  gas transport properties of several PIMs over time after methanol treatment. The numeric labels indicate days elapsed.

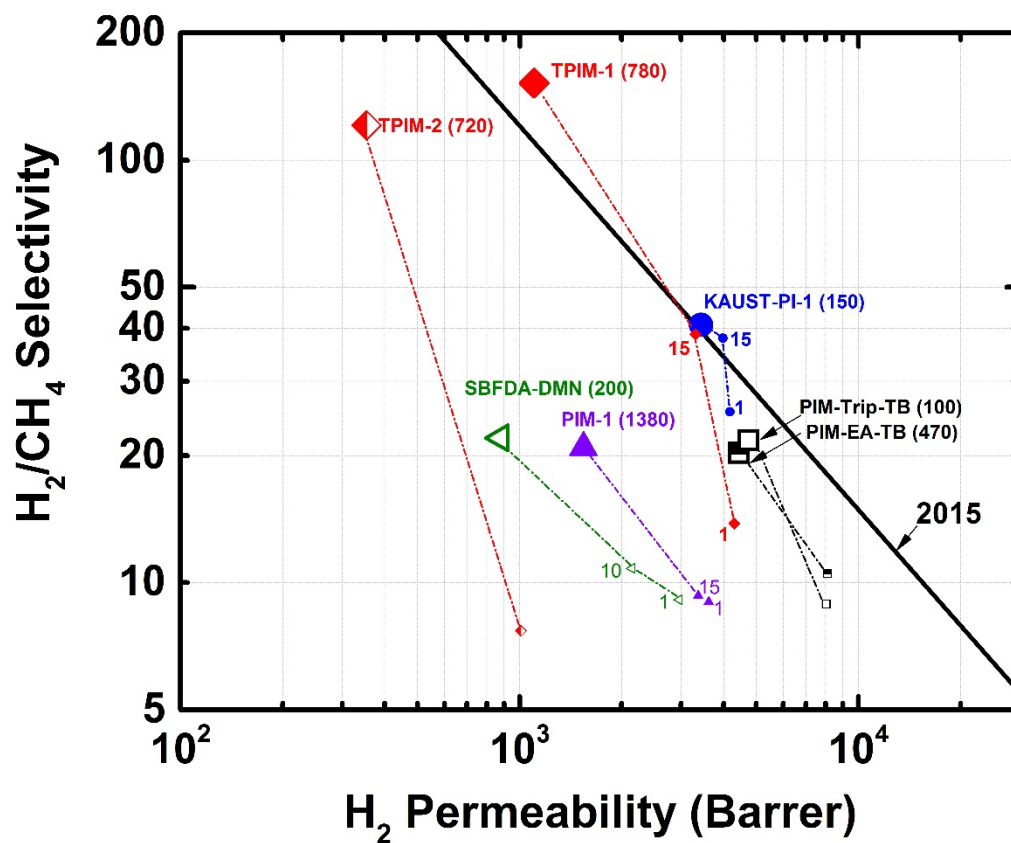

**Figure S3.** Evolution of the  $H_2/CH_4$  gas transport properties of several PIMs over time after methanol treatment. The numeric labels indicate days elapsed.
